# Supplementary material for: Oral frailty and neurodegeneration in Alzheimer’s disease
Source: PubMed Central journal article supplement — Neural Regen Res. 2021 Mar 25;16(11):2149–53. doi: 10.4103/1673-5374.310672 (PMC8354109; doi:10.4103/1673-5374.310672), 2021-03-25
Supplement: NRR-16-2149_Suppl1.pdf [file NRR-16-2149_Suppl1.pdf]

## OPEN PEER REVIEW REPORT 1

**Name of journal:** Neural Regeneration Research

**Manuscript NO:** NRR-D-20-00890

**Title:** Oral Frailty and Neurodegeneration in Alzheimer's Disease

**Reviewer's Name:** Juana María Morillas-Ruiz

**Reviewer's country:** Spain

### COMMENTS TO AUTHORS

The strength of this article lies in the novel character posed by oral fragility as a risk factor for cognitive impairment. And as a consequence of this strength, the weaknesses are the shortage of scientific articles based on experimental studies in humans that support the subject matter. But this weakness will bear fruit with studies that will soon be generated by researchers working on these issues of oral fragility, microbiota and cognitive impairment

I would like to know, based on the review that you have carried out in this article, if you know of any supplement or drug marketed that is aimed at preventing cognitive impairment through treating or preventing oral fragility
